# Supplementary material for: The Underuse of Clozapine and Long-Acting Injectable Antipsychotics
Source: Atypon-hosted journal article supplement (doi:10.1176/appi.ps.20240110), 2024-10-09
Supplement: appi.ps.20240110.ds001.pdf [file appi.ps.20240110.ds001.pdf]

**Availability of long-acting injectable antipsychotics in the United States**

| <b>Name</b>                     | <b>Trade name</b> | <b>Duration of injection</b> | <b>Generic</b> |
|---------------------------------|-------------------|------------------------------|----------------|
| <b>fluphenazine decanoate</b>   | Prolixin          | 2-5 weeks                    | Yes            |
| <b>haloperidol decanoate</b>    | Haldol            | 4 weeks                      | Yes            |
| <b>flupenthixol</b>             | Depixol           | 2-3 weeks                    | Yes            |
| <b>risperidone microspheres</b> | Risperdol Consta  | 2 weeks                      | Yes            |
| <b>risperidone</b>              | Uzedy             | 1-2 months                   | No             |
| <b>aripiprazole monohydrate</b> | Abilify Maintena  | 1 month                      | Yes            |
| <b>aripiprazole lauroxil</b>    | Aristada          | 4-8 weeks                    | Yes            |
| <b>olanzapine pamoate</b>       | Zyprexa Relprevv  | 4 weeks                      | Yes            |
| <b>paliperidone palmitate</b>   | Invega Sustenna   | 1 month                      | Yes            |
|                                 | Invega Trinza     | 3 months                     | No             |
|                                 | Invega Hafyera    | 6 months                     | No             |
